# Supplementary figures and images for: Determination of arsenic by ICP-MS after retention on thoria nanoparticles
Source: Royal Society of Chemistry journal article supplement (doi:10.1039/c4ay02181a), 2014-11-19

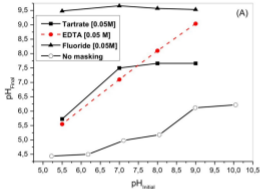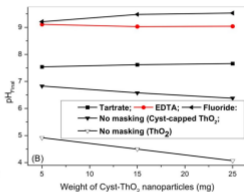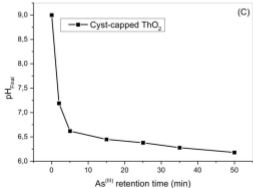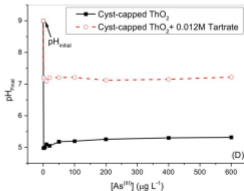

Supplement: c4ay02181a1.pdf [file c4ay02181a1.pdf]

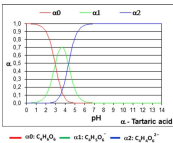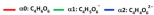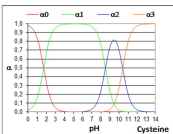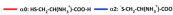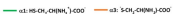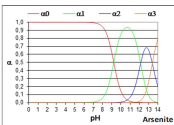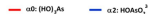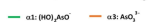

Supplement: c4ay02181a2.pdf [file c4ay02181a2.pdf]

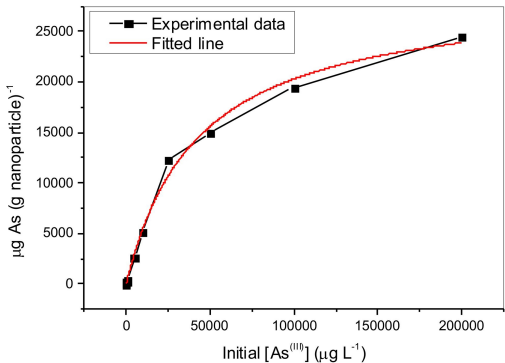

Supplement: c4ay02181a3.pdf [file c4ay02181a3.pdf]
